# Supplementary material for: Chinese herbal formula (GCNY)-medicated serum alleviates peroxidation induced by H2O2 in human microglial cells
Source: Front Neurosci. 2022 Sep 14;16:990040. doi: 10.3389/fnins.2022.990040 (PMC9515651; doi:10.3389/fnins.2022.990040)
Supplement: Supplementary file 1 [file Table_1.xls]

## Sheet: DEGs NC vs. (NC+H2O2)
Differentially expressed genes compared NC+H2O2 group with control group
Gene ID	NCBI Gene ID	Gene Symbol	Q value	Log 2 (Fold change)	Regulated
2901	2901	GRIK5	0.031769	2.09279	Up
100507747	100507747	C13orf46	0.0302575	1.30758	Up
65266	65266	WNK4	0.00258705	1.2263	Up
9001	9001	HAP1	0.00710276	1.18722	Up
102723360	102723360	LOC102723360	0.0496376	0.865957	Up
8764	8764	TNFRSF14	0.0155873	0.61631	Up
79844	79844	ZDHHC11	2.31e-06	0.58622	Up
2729	2729	GCLC	6.16e-08	0.581718	Up
55063	55063	ZCWPW1	0.0308802	0.564554	Up
9134	9134	CCNE2	0.00367156	0.559698	Up
81621	81621	KAZALD1	0.000994	0.550872	Up
9245	9245	GCNT3	0.0177141	0.549984	Up
3162	3162	HMOX1	0.0383348	0.515912	Up
83716	83716	CRISPLD2	0.00209177	0.503702	Up
29948	29948	OSGIN1	0.00161279	0.491439	Up
55388	55388	MCM10	3.05e-05	0.473595	Up
64718	64718	UNKL	0.000552	0.473555	Up
374393	374393	FAM111B	0.000726	0.45869	Up
55245	55245	UQCC1	0.00033	0.4568	Up
9903	9903	KLHL21	3.43e-07	0.433489	Up
195828	195828	ZNF367	0.001923	0.429541	Up
5111	5111	PCNA	1.06e-10	0.426101	Up
51514	51514	DTL	8.63e-08	0.425361	Up
389831	389831	LOC389831	0.0442937	0.42025	Up
7355	7355	SLC35A2	1.9e-05	0.418287	Up
5166	5166	PDK4	0.000201	0.409441	Up
7296	7296	TXNRD1	2.37e-08	0.409111	Up
10381	10381	TUBB3	0.000357	0.402979	Up
10432	10432	RBM14	3.08e-06	0.400684	Up
650	650	BMP2	0.00526365	0.399798	Up
151188	151188	ARL6IP6	0.047921	0.392404	Up
49854	49854	ZBTB21	0.0169007	0.389088	Up
1479	1479	CSTF3	0.000734	0.386418	Up
84842	84842	HPDL	0.00226264	0.382809	Up
102157402	102157402	AK6	0.0253435	0.374189	Up
993	993	CDC25A	0.000127	0.367514	Up
1870	1870	E2F2	0.0202981	0.365707	Up
7037	7037	TFRC	0.000113	0.3625	Up
26353	26353	HSPB8	0.00079	0.361336	Up
2730	2730	GCLM	0.00119231	0.359983	Up
4335	4335	MNT	0.00145752	0.357358	Up
10329	10329	RXYLT1	0.047851	0.353963	Up
140809	140809	SRXN1	1.64e-05	0.340231	Up
29893	29893	PSMC3IP	0.0248137	0.340059	Up
10007	10007	GNPDA1	0.00161297	0.334453	Up
7884	7884	SLBP	0.000359	0.332409	Up
8878	8878	SQSTM1	1.34e-08	0.33036	Up
147166	147166	TRIM16L	0.000156	0.321466	Up
55723	55723	ASF1B	0.0013798	0.319567	Up
4998	4998	ORC1	0.0292634	0.316189	Up
8824	8824	CES2	0.0474304	0.313606	Up
4800	4800	NFYA	0.0479129	0.306013	Up
1869	1869	E2F1	0.00256238	0.305702	Up
4171	4171	MCM2	2.85e-05	0.300472	Up
100996939	100996939	PYURF	0.0479922	0.299863	Up
22861	22861	NLRP1	0.0343208	0.296984	Up
4097	4097	MAFG	0.000625	0.293821	Up
81620	81620	CDT1	0.00104113	0.291102	Up
51307	51307	FAM53C	0.0244631	0.287997	Up
7358	7358	UGDH	0.00572296	0.286861	Up
51283	51283	BFAR	0.0019984	0.278579	Up
55588	55588	MED29	0.00790399	0.274819	Up
1106	1106	CHD2	0.00684226	0.272582	Up
6241	6241	RRM2	0.0116196	0.259198	Up
23336	23336	SYNM	0.031769	0.256991	Up
10036	10036	CHAF1A	0.00495238	0.25269	Up
8560	8560	DEGS1	0.0238795	0.246363	Up
113130	113130	CDCA5	0.0404979	0.244933	Up
9550	9550	ATP6V1G1	0.0129468	0.243932	Up
9240	9240	PNMA1	0.0479129	0.242403	Up
27316	27316	RBMX	0.000886	0.242322	Up
10105	10105	PPIF	0.00591691	0.242259	Up
1719	1719	DHFR	0.0333064	0.241617	Up
3301	3301	DNAJA1	0.00982932	0.23751	Up
9189	9189	ZBED1	0.0238795	0.237226	Up
81631	81631	MAP1LC3B	0.00934919	0.235698	Up
4074	4074	M6PR	0.0121623	0.234974	Up
990	990	CDC6	0.00662929	0.234627	Up
2237	2237	FEN1	0.0159756	0.232556	Up
6550	6550	SLC9A3	0.0401366	0.227681	Up
6294	6294	SAFB	0.0252861	0.226241	Up
5411	5411	PNN	0.0294367	0.226084	Up
116225	116225	ZMYND19	0.0234214	0.224416	Up
7374	7374	UNG	0.0253435	0.222716	Up
2956	2956	MSH6	0.028824	0.214093	Up
4071	4071	TM4SF1	0.0242486	0.202321	Up
10016	10016	PDCD6	0.0381889	0.199325	Up
9516	9516	LITAF	0.0479129	0.185617	Up
6228	6228	RPS23	0.0456003	0.169163	Up
10985	10985	GCN1	0.030146	-0.191736	Down
23225	23225	NUP210	0.00839941	-0.206628	Down
51421	51421	AMOTL2	0.0169007	-0.211343	Down
375790	375790	AGRN	0.00495238	-0.211413	Down
1601	1601	DAB2	0.00366701	-0.212213	Down
1778	1778	DYNC1H1	0.0455484	-0.212946	Down
64757	64757	MTARC1	0.0239464	-0.216327	Down
9780	9780	PIEZO1	0.00729929	-0.21826	Down
9055	9055	PRC1	0.00221914	-0.224054	Down
55165	55165	CEP55	0.0388041	-0.224444	Down
2316	2316	FLNA	0.00079	-0.224969	Down
23204	23204	ARL6IP1	0.00269398	-0.232037	Down
26509	26509	MYOF	0.0343661	-0.233264	Down
3014	3014	H2AX	0.0379119	-0.233679	Down
7025	7025	NR2F1	0.0442937	-0.235872	Down
54908	54908	SPDL1	0.0137397	-0.23774	Down
6709	6709	SPTAN1	0.000184	-0.24111	Down
11124	11124	FAF1	0.00526365	-0.241518	Down
1373	1373	CPS1	0.00353149	-0.243917	Down
9133	9133	CCNB2	0.0100486	-0.24503	Down
23468	23468	CBX5	0.0405355	-0.246105	Down
5493	5493	PPL	0.00850324	-0.24629	Down
890	890	CCNA2	0.018206	-0.247132	Down
81611	81611	ANP32E	0.0096868	-0.249224	Down
7020	7020	TFAP2A	0.0450003	-0.25161	Down
51203	51203	NUSAP1	0.0034348	-0.253314	Down
5144	5144	PDE4D	0.013084	-0.257576	Down
9968	9968	MED12	0.0415461	-0.257783	Down
10765	10765	KDM5B	0.0351982	-0.258074	Down
8239	8239	USP9X	0.0019984	-0.263641	Down
135112	135112	NCOA7	0.0286597	-0.264895	Down
6904	6904	TBCD	0.0460285	-0.264896	Down
9592	9592	IER2	0.00923849	-0.267362	Down
3911	3911	LAMA5	0.00144309	-0.269293	Down
60412	60412	EXOC4	0.0271235	-0.271568	Down
29899	29899	GPSM2	0.00592683	-0.272557	Down
7094	7094	TLN1	0.000314	-0.275647	Down
653464	653464	SRGAP2C	0.0416808	-0.276458	Down
10902	10902	BRD8	0.0255622	-0.279277	Down
23301	23301	EHBP1	0.0486007	-0.280394	Down
3726	3726	JUNB	0.00057	-0.28162	Down
54820	54820	NDE1	0.02292	-0.282475	Down
55755	55755	CDK5RAP2	0.000925	-0.282927	Down
10274	10274	STAG1	0.0479129	-0.282953	Down
3912	3912	LAMB1	0.00349088	-0.283327	Down
31	31	ACACA	0.00729929	-0.284803	Down
1164	1164	CKS2	0.0150853	-0.289083	Down
4035	4035	LRP1	0.00295881	-0.298404	Down
103344718	103344718	HOTS	0.016717	-0.299059	Down
64759	64759	TNS3	0.00982932	-0.299409	Down
11005	11005	SPINK5	1.53e-05	-0.301865	Down
63892	63892	THADA	0.0210822	-0.301895	Down
55355	55355	HJURP	0.0155873	-0.304677	Down
104	104	ADARB1	3.56e-06	-0.305168	Down
9793	9793	CKAP5	1.9e-05	-0.307646	Down
8870	8870	IER3	0.00754319	-0.309731	Down
1894	1894	ECT2	0.0100201	-0.309855	Down
3835	3835	KIF22	0.00353149	-0.31048	Down
1808	1808	DPYSL2	0.0464496	-0.311119	Down
26586	26586	CKAP2	0.00723831	-0.31149	Down
3148	3148	HMGB2	0.00835892	-0.312757	Down
23046	23046	KIF21B	0.0123112	-0.312872	Down
55604	55604	CARMIL1	0.047921	-0.314084	Down
9918	9918	NCAPD2	0.00454045	-0.314673	Down
4281	4281	MID1	0.0127679	-0.317423	Down
158056	158056	MAMDC4	0.047921	-0.317497	Down
2353	2353	FOS	0.0479129	-0.319084	Down
90417	90417	KNSTRN	0.00318966	-0.32194	Down
5939	5939	RBMS2	0.00738657	-0.323435	Down
23380	23380	SRGAP2	0.00835892	-0.325462	Down
3339	3339	HSPG2	0.000166	-0.325684	Down
57719	57719	ANO8	0.023201	-0.328687	Down
23526	23526	ARHGAP45	0.0150853	-0.330201	Down
221895	221895	JAZF1	0.0440602	-0.330618	Down
80114	80114	BICC1	0.00219736	-0.333597	Down
3491	3491	CCN1	5.71e-05	-0.334638	Down
8496	8496	PPFIBP1	0.0455484	-0.337957	Down
9212	9212	AURKB	0.015835	-0.338572	Down
3005	3005	H1-0	8.7e-08	-0.338683	Down
6645	6645	SNTB2	0.0464496	-0.339251	Down
10725	10725	NFAT5	5.85e-05	-0.340224	Down
55075	55075	UACA	0.0252613	-0.342447	Down
1039	1039	CDR2	0.00516866	-0.343515	Down
7675	7675	ZNF121	0.0436114	-0.348704	Down
3838	3838	KPNA2	2.46e-08	-0.351572	Down
23220	23220	DTX4	0.0401366	-0.351754	Down
138429	138429	PIP5KL1	0.00599607	-0.352964	Down
128239	128239	IQGAP3	8.41e-06	-0.354097	Down
54663	54663	WDR74	0.000109	-0.355716	Down
60676	60676	PAPPA2	0.0253435	-0.358484	Down
89958	89958	SAPCD2	7.43e-06	-0.361388	Down
976	976	ADGRE5	3.56e-06	-0.362958	Down
57118	57118	CAMK1D	0.00154716	-0.363019	Down
22822	22822	PHLDA1	0.00161279	-0.363286	Down
10253	10253	SPRY2	0.0379119	-0.363813	Down
619279	619279	ZNF704	0.0487596	-0.368529	Down
343099	343099	CCDC18	0.0155873	-0.370502	Down
10628	10628	TXNIP	0.000353	-0.370547	Down
7272	7272	TTK	0.0184424	-0.375999	Down
9585	9585	KIF20B	0.0150853	-0.376062	Down
11065	11065	UBE2C	2.29e-05	-0.380813	Down
11004	11004	KIF2C	4.37e-07	-0.382135	Down
10024	10024	TROAP	3.32e-05	-0.382935	Down
3725	3725	JUN	0.00601479	-0.38322	Down
3691	3691	ITGB4	2.28e-08	-0.38368	Down
10926	10926	DBF4	0.000524	-0.386934	Down
146909	146909	KIF18B	0.00268238	-0.388534	Down
64151	64151	NCAPG	4.1e-06	-0.390924	Down
51512	51512	GTSE1	0.000164	-0.405787	Down
150468	150468	CKAP2L	0.000844	-0.40655	Down
283991	283991	UBALD2	0.00753224	-0.406659	Down
25923	25923	ATL3	0.00859207	-0.410171	Down
140710	140710	SOGA1	3.62e-07	-0.427182	Down
83540	83540	NUF2	0.000182	-0.428282	Down
55632	55632	G2E3	0.0307419	-0.431785	Down
51750	51750	RTEL1	0.000511	-0.434732	Down
4774	4774	NFIA	0.000897	-0.437399	Down
55771	55771	PRR11	4.32e-06	-0.443969	Down
1316	1316	KLF6	0.00679784	-0.444642	Down
55143	55143	CDCA8	3.46e-05	-0.448553	Down
55789	55789	DEPDC1B	0.00495238	-0.449646	Down
891	891	CCNB1	1.64e-11	-0.450829	Down
29990	29990	PILRB	0.00253205	-0.451013	Down
10460	10460	TACC3	8.56e-07	-0.451738	Down
1490	1490	CCN2	7.42e-11	-0.455555	Down
3833	3833	KIFC1	4.43e-06	-0.456427	Down
54443	54443	ANLN	4.7e-06	-0.457181	Down
10615	10615	SPAG5	4.41e-06	-0.471516	Down
6926	6926	TBX3	0.0249749	-0.472017	Down
23233	23233	EXOC6B	1.9e-05	-0.472685	Down
3832	3832	KIF11	1.96e-08	-0.472802	Down
9700	9700	ESPL1	8.66e-07	-0.472852	Down
79707	79707	NOL9	0.02292	-0.478429	Down
22974	22974	TPX2	7.7e-12	-0.479777	Down
24137	24137	KIF4A	2.01e-08	-0.480411	Down
9824	9824	ARHGAP11A	3.78e-06	-0.481026	Down
10239	10239	AP3S2	0.0328797	-0.487154	Down
1958	1958	EGR1	1.96e-08	-0.488037	Down
29127	29127	RACGAP1	1.74e-10	-0.490165	Down
11113	11113	CIT	1.53e-05	-0.490317	Down
991	991	CDC20	3.48e-12	-0.498222	Down
84220	84220	RGPD5	4.23e-05	-0.500728	Down
9493	9493	KIF23	6.95e-09	-0.504612	Down
79718	79718	TBL1XR1	1.85e-05	-0.505326	Down
55635	55635	DEPDC1	2.66e-05	-0.508372	Down
153769	153769	SH3RF2	0.0248037	-0.514246	Down
701	701	BUB1B	2.6e-10	-0.534271	Down
1063	1063	CENPF	2.03e-09	-0.536829	Down
22834	22834	ZNF652	0.018206	-0.555583	Down
3619	3619	INCENP	4.99e-08	-0.556925	Down
4288	4288	MKI67	1.9e-10	-0.55823	Down
4194	4194	MDM4	0.00194392	-0.562369	Down
387640	387640	SKIDA1	0.0245144	-0.57439	Down
283431	283431	GAS2L3	0.000384	-0.59318	Down
995	995	CDC25C	0.000281	-0.599002	Down
83461	83461	CDCA3	2.33e-10	-0.612219	Down
7153	7153	TOP2A	2.46e-16	-0.625357	Down
699	699	BUB1	1.69e-17	-0.626495	Down
84986	84986	ARHGAP19	0.00100701	-0.63039	Down
3161	3161	HMMR	3.63e-10	-0.651364	Down
6790	6790	AURKA	4e-24	-0.683687	Down
79866	79866	BORA	7.67e-06	-0.685364	Down
84904	84904	ARHGEF39	0.000218	-0.701457	Down
5347	5347	PLK1	6.88e-24	-0.702793	Down
1058	1058	CENPA	5.63e-11	-0.714648	Down
81610	81610	FAM83D	2.77e-15	-0.71612	Down
10403	10403	NDC80	3.73e-09	-0.719566	Down
81930	81930	KIF18A	2.02e-13	-0.726772	Down
899	899	CCNF	3.26e-18	-0.730032	Down
51343	51343	FZR1	3.39e-14	-0.730191	Down
157313	157313	CDCA2	2.02e-13	-0.733845	Down
55175	55175	KLHL11	0.00366912	-0.747803	Down
729533	729533	FAM72A	5.42e-06	-0.748263	Down
9787	9787	DLGAP5	3.93e-12	-0.74955	Down
151246	151246	SGO2	8.45e-06	-0.768083	Down
554282	554282	FAM72C	7.69e-06	-0.786465	Down
9928	9928	KIF14	8.71e-10	-0.800005	Down
10112	10112	KIF20A	2.02e-23	-0.823783	Down
653820	653820	FAM72B	1.9e-11	-0.82901	Down
728833	728833	FAM72D	3.24e-06	-0.870093	Down
126282	126282	TNFAIP8L1	0.0479129	-0.892618	Down
2354	2354	FOSB	3.32e-05	-0.92278	Down
9754	9754	STARD8	4.76e-05	-0.933878	Down
901	901	CCNG2	0.00624869	-0.963258	Down
1062	1062	CENPE	2.59e-19	-1.09687	Down
5998	5998	RGS3	9.43e-10	-1.12762	Down
84722	84722	PSRC1	2.05e-18	-1.15767	Down
54492	54492	NEURL1B	0.0177141	-1.20688	Down
80119	80119	PIF1	2.24e-11	-1.5169	Down
