# Supplementary material for: Chinese herbal formula (GCNY)-medicated serum alleviates peroxidation induced by H2O2 in human microglial cells
Source: Front Neurosci. 2022 Sep 14;16:990040. doi: 10.3389/fnins.2022.990040 (PMC9515651; doi:10.3389/fnins.2022.990040)
Supplement: Supplementary file 2 [file Table_2.xls]

## Sheet: DEGs (NC+H2O2) vs. GCNY 
Differentially expressed genes compared GCNY group with NC+H2O2 group
Gene ID	NCBI Gene ID	Gene Symbol	Q value	Log2 (Fold change)	Regulated
100528062	100528062	ARMCX5-GPRASP2	0.0158893	1.10457	Up
25832	25832	NBPF14	0.0158893	0.318243	Up
55771	55771	PRR11	0.000116	0.297267	Up
9857	9857	CEP350	0.0139892	0.24917	Up
1063	1063	CENPF	0.000116	0.239405	Up
31	31	ACACA	0.00186919	0.236936	Up
259266	259266	ASPM	0.000626	0.225946	Up
9652	9652	TTC37	0.00223886	0.224353	Up
79026	79026	AHNAK	3.69e-06	0.211416	Up
3312	3312	HSPA8	0.000278	0.209038	Up
54822	54822	TRPM7	0.0377849	0.203527	Up
4288	4288	MKI67	0.00223886	0.201932	Up
6596	6596	HLTF	0.00127783	0.199137	Up
9735	9735	KNTC1	0.0440593	0.191871	Up
3303	3303	HSPA1A	0.0306338	0.188434	Up
26115	26115	TANC2	0.0443596	0.181776	Up
7153	7153	TOP2A	0.0181346	0.166234	Up
3320	3320	HSP90AA1	1.38e-05	0.162408	Up
1122	1122	CHML	0.0196403	0.160815	Up
4651	4651	MYO10	0.00575892	0.15526	Up
5591	5591	PRKDC	0.000514	0.154498	Up
5903	5903	RANBP2	0.0337426	0.139067	Up
8473	8473	OGT	0.00223886	0.129592	Up
1975	1975	EIF4B	0.0256887	0.125086	Up
10075	10075	HUWE1	0.0158893	0.1249	Up
8826	8826	IQGAP1	0.0158893	0.11941	Up
1373	1373	CPS1	0.0497602	0.118734	Up
1915	1915	EEF1A1	0.0128758	0.10662	Up
81539	81539	SLC38A1	0.03604	0.105284	Up
567	567	B2M	0.0158893	-0.107973	Down
5901	5901	RAN	0.0158893	-0.119116	Down
9168	9168	TMSB10	0.0259504	-0.144081	Down
1327	1327	COX4I1	0.0391907	-0.152984	Down
3106	3106	HLA-B	0.0282422	-0.154965	Down
1465	1465	CSRP1	0.00223886	-0.158095	Down
140576	140576	S100A16	0.000514	-0.160351	Down
4791	4791	NFKB2	0.0238896	-0.161056	Down
6628	6628	SNRPB	0.0306338	-0.163374	Down
4946	4946	OAZ1	0.0364729	-0.166019	Down
55969	55969	RAB5IF	0.0144523	-0.172013	Down
3958	3958	LGALS3	0.0282422	-0.173177	Down
6881	6881	TAF10	0.0349123	-0.175205	Down
10169	10169	SERF2	0.0333599	-0.179479	Down
54732	54732	TMED9	0.0443596	-0.180457	Down
10410	10410	IFITM3	0.0144523	-0.180461	Down
6277	6277	S100A6	0.00223886	-0.183288	Down
26472	26472	PPP1R14B	0.00738792	-0.183748	Down
1340	1340	COX6B1	0.0333599	-0.184979	Down
10581	10581	IFITM2	0.00331859	-0.188052	Down
1397	1397	CRIP2	0.0254732	-0.203255	Down
1396	1396	CRIP1	0.00417466	-0.205341	Down
83442	83442	SH3BGRL3	0.0158893	-0.207409	Down
250	250	ALPP	0.00223886	-0.209309	Down
6275	6275	S100A4	0.0094091	-0.213994	Down
25798	25798	BRI3	0.0158893	-0.225495	Down
10398	10398	MYL9	0.00517723	-0.233507	Down
127687	127687	C1orf122	0.00738792	-0.301859	Down
102723728	102723728	LOC102723728	0.000514	-0.516769	Down
